# Supplementary material
Source: publisher figshare collection journal article supplement (https://acs.figshare.com/ndownloader/files/3596847)
Supplement: Supplementary file 1 [file 3596847]

## **Supplementary Information**

### **Packing of Isophthalate Tetracarboxylic Acids on Au(111): Rows and Disordered Herringbone Structures**

Izabela Cebula, Emily F. Smith, Maria del Carmen Gimenez-Lopez, Sihai Yang,  
Martin Schröder, Neil R. Champness, and Peter H. Beton

## 1. Synthesis

BPTC, TPTC and QPTC molecules were synthesised as reported previously<sup>1</sup>.

## 2. Calculations

Density functional theory (DFT) calculations were carried out using the DMol3 package in Materials Studio. The generalised gradient approximation functional of Perdew-Burke-Ernzerhof<sup>2</sup> was implemented. Core electrons were represented by effective core potentials constructed according to the method of Bergner *et. al.*<sup>3</sup>, while double numerical basis sets with polarization functions were used for the valence electrons. The radius within which the atomic orbitals are strictly localized was set to 3.7 Å. For geometry optimisations the structure was considered to have converged when the force on the atoms was  $< 0.1 \text{ eV } \text{\AA}^{-1}$ . A default convergence tolerance of  $10^{-5} \text{ eV}$  was employed for the self-consistent field cycle at each stage of the optimization process.

The optimised geometries of molecules BPTC, TPTC and QPTC were found to be planar in the gas phase without the need to introduce constraints.

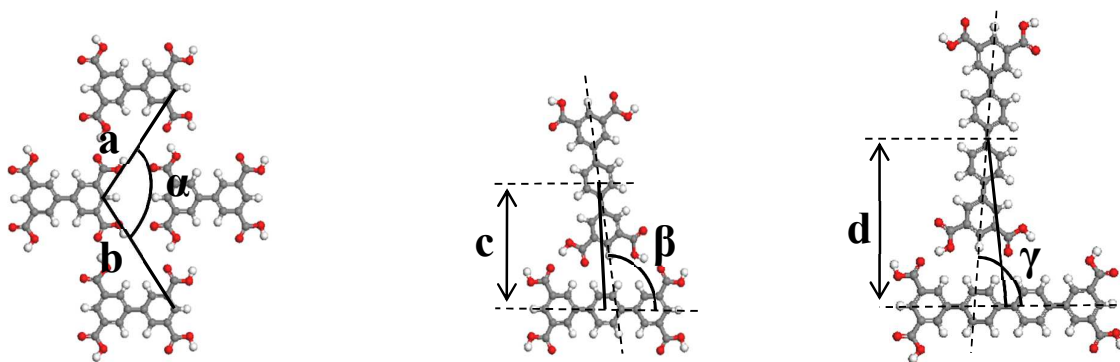

**Figure S1.** Schematic representation of a) unit cell formed by BPTC molecules; b) hydrogen bonds forming junction of two TPTC molecules and c) two QPTC molecules.

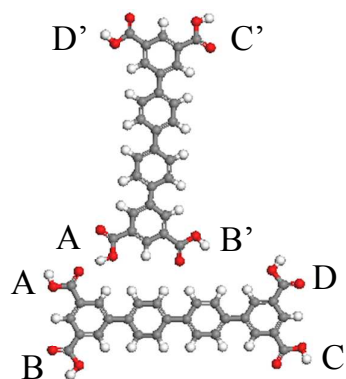

**Figure S2.** Hydrogen bonding in carboxylate moieties of QPTC

**Table S1.** DFT analysis for packing of BPTC

| Model 1                                                                            | Model 2                                                                              |
|------------------------------------------------------------------------------------|--------------------------------------------------------------------------------------|
| 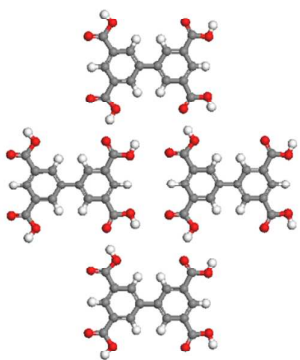 |  |
| $\Delta E = -1.23 \text{ eV}$                                                      | $\Delta E = -1.20 \text{ eV}$                                                        |
| $a = b = 1.18 \text{ nm} \pm 0.01 \text{ nm}$                                      | $a = b = 1.18 \text{ nm} \pm 0.01 \text{ nm}$                                        |
| $\alpha = 108.9 \pm 0.1^\circ$                                                     | $\alpha = 109.9 \pm 0.1^\circ$                                                       |

**Table S2. DFT analysis for packing of TPTC**

|                                                                                                        |                                                                                      |
|--------------------------------------------------------------------------------------------------------|--------------------------------------------------------------------------------------|
| <b>TPTC-1-TPTC-1</b><br>$\Delta E = -0.53 \text{ eV}$<br>$c = 1.19 \text{ nm}$<br>$\beta = 88.2^\circ$ | 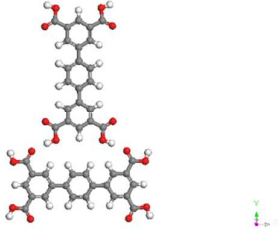   |
| <b>TPTC-2-TPTC-2</b><br>$\Delta E = -0.31 \text{ eV}$<br>$c = 1.14 \text{ nm}$<br>$\beta = 88.3^\circ$ |    |
| <b>TPTC-1-TPTC-2</b><br>$\Delta E = -0.44 \text{ eV}$<br>$c = 1.13 \text{ nm}$<br>$\beta = 88.9^\circ$ |   |
| <b>TPTC-3-TPTC-3</b><br>$\Delta E = -0.37 \text{ eV}$<br>$c = 1.17 \text{ nm}$<br>$\beta = 92.4^\circ$ |  |
| <b>TPTC-4-TPTC-4</b><br>$\Delta E = -0.38 \text{ eV}$<br>$c = 1.17 \text{ nm}$<br>$\beta = 88.1^\circ$ |  |

|                                                                                                                                                            |                                                                                      |
|------------------------------------------------------------------------------------------------------------------------------------------------------------|--------------------------------------------------------------------------------------|
| <p><b>TPTC-1-TPTC-3</b></p> <p><math>\Delta E = -0.62 \text{ eV}</math></p> <p><math>c = 1.15 \text{ nm}</math></p> <p><math>\beta = 97.2^\circ</math></p> | 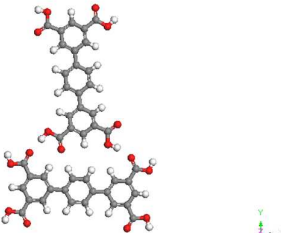   |
| <p><b>TPTC-2-TPTC-3</b></p> <p><math>\Delta E = -0.29 \text{ eV}</math></p> <p><math>c = 1.16 \text{ nm}</math></p> <p><math>\beta = 93.7^\circ</math></p> |    |
| <p><b>TPTC-2-TPTC-1</b></p> <p><math>\Delta E = -0.44 \text{ eV}</math></p> <p><math>c = 1.17</math></p> <p><math>\beta = 90.1^\circ</math></p>            |   |
| <p><b>TPTC-3-TPTC-1</b></p> <p><math>\Delta E = -0.49 \text{ eV}</math></p> <p><math>c = 1.17 \text{ nm}</math></p> <p><math>\beta = 89.1^\circ</math></p> |  |
| <p><b>TPTC-3-TPTC-2</b></p> <p><math>\Delta E = -0.25 \text{ eV}</math></p> <p><math>c = 1.14 \text{ nm}</math></p> <p><math>\beta = 88.8^\circ</math></p> |  |

|                                                                                                        |                                                                                    |
|--------------------------------------------------------------------------------------------------------|------------------------------------------------------------------------------------|
| <b>TPTC-4-TPTC-2</b><br>$\Delta E = -0.25 \text{ eV}$<br>$c = 1.16 \text{ nm}$<br>$\beta = 90.7^\circ$ | 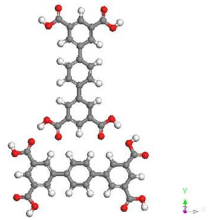 |
| <b>TPTC-4-TPTC-1</b><br>$\Delta E = -0.48 \text{ eV}$<br>$c = 1.14 \text{ nm}$<br>$\beta = 91.3^\circ$ |  |

**Table S3. DFT analysis for packing of QPTC**

The nomenclature ‘O H O’ etc. indicates whether an O/H atom is directed towards the neighbouring molecule in the positions A, A’ and B’ defined above.

|                                                                                                                         |                                                                                      |
|-------------------------------------------------------------------------------------------------------------------------|--------------------------------------------------------------------------------------|
| <b>QPTC_1- QPTC_1</b><br><b>O H O</b><br>$\Delta E: -0.39 \text{ eV}$<br>$d = 1.39 \text{ nm}$<br>$\gamma = 85.5^\circ$ | 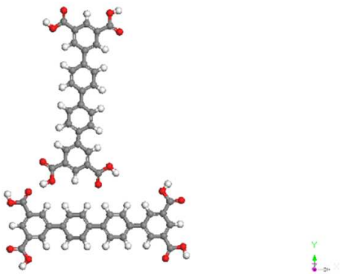 |
| <b>QPTC_1- QPTC_2</b><br><b>O O O</b><br>$\Delta E: -0.37 \text{ eV}$<br>$d = 1.37 \text{ nm}$<br>$\gamma = 89.9^\circ$ |  |

|                                                                                                                                                 |                                                                                                                                                                           |
|-------------------------------------------------------------------------------------------------------------------------------------------------|---------------------------------------------------------------------------------------------------------------------------------------------------------------------------|
| <p><b>QPTC_1- QPTC_3</b></p> <p><b>O H H</b></p> <p><math>\Delta E</math>: -0.28 eV</p> <p>d=1.41 nm</p> <p><math>\gamma= 89.3^\circ</math></p> | 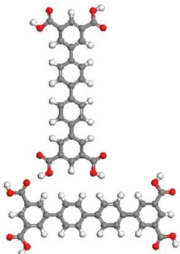      |
| <p><b>QPTC_1- QPTC_4</b></p> <p><b>O O H</b></p> <p><math>\Delta E</math>: -0.30 eV</p> <p>d=1.37 nm</p> <p><math>\gamma=90.6^\circ</math></p>  |       |
| <p><b>QPTC_5- QPTC_5</b></p> <p><b>H O H</b></p> <p><math>\Delta E</math>: -0.11 eV</p> <p>d=1.38 nm</p> <p><math>\gamma=92.8^\circ</math></p>  |    |
| <p><b>QPTC_5- QPTC_1</b></p> <p><b>H H O</b></p> <p><math>\Delta E</math>: -0.33 eV</p> <p>d=1.38 nm</p> <p><math>\gamma= 86.7^\circ</math></p> |   |

|                                                                                                       |                                                                                    |
|-------------------------------------------------------------------------------------------------------|------------------------------------------------------------------------------------|
| <b>QPTC_5- QPTC_2</b><br><b>H O O</b><br>$\Delta E$ : -0.21 eV<br>$d=1.38$ nm<br>$\gamma= 90.2^\circ$ | 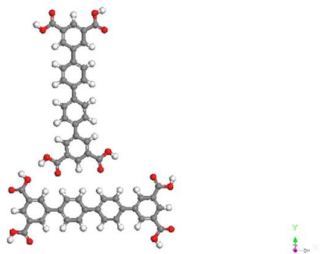 |
| <b>QPTC_5- QPTC_3</b><br><b>H H H</b><br>$\Delta E$ : -0.20 eV<br>$d=1.40$ nm<br>$\gamma= 89.2^\circ$ |  |

### 3. X-ray photoelectron spectroscopy (XPS) measurements

A Kratos AXIS ULTRA DLD instrument with a mono-chromated Al  $K_\alpha$  X-ray source (1486.6 eV) was used and operated at 10 mA emission current and 12 kV anode potential. The lens mode used was hybrid-slot and pass energies 80 eV and 20 eV were used for the wide and high resolution scans respectively. Spectra were acquired at room temperature.

XPS spectra in Figure S3 provide information about the chemical state of adsorbed species. For TPTC deposited from water on gold (Figure S3c) the main C1s peak ( $\sim 284.0$  eV) is assigned to carbon atoms in aromatic rings. Two peaks at  $\sim 285.0$  eV and  $\sim 286.4$  eV can be attributed to possible minor contaminations since similar features are found in C1s spectra for a control gold sample which had been immersed in water for several minutes (Figure S3e). The peak at  $\sim 288.0$  eV is attributed to carbon atoms in COOH groups. For the same molecule in the O1s region broad peak can be decomposed into two contributions from carbonyl ( $\sim 531.3$  eV) and hydroxy ( $\sim 532.9$  eV) groups respectively (Figure S3d). XPS spectra of TPTC can be compared to those obtained for a powder sample (Figure S3a,b). These



measurements confirm that the carboxylic acid groups of TPTC molecule remain protonated upon adsorption on the Au(111) surface under the conditions employed in this study.

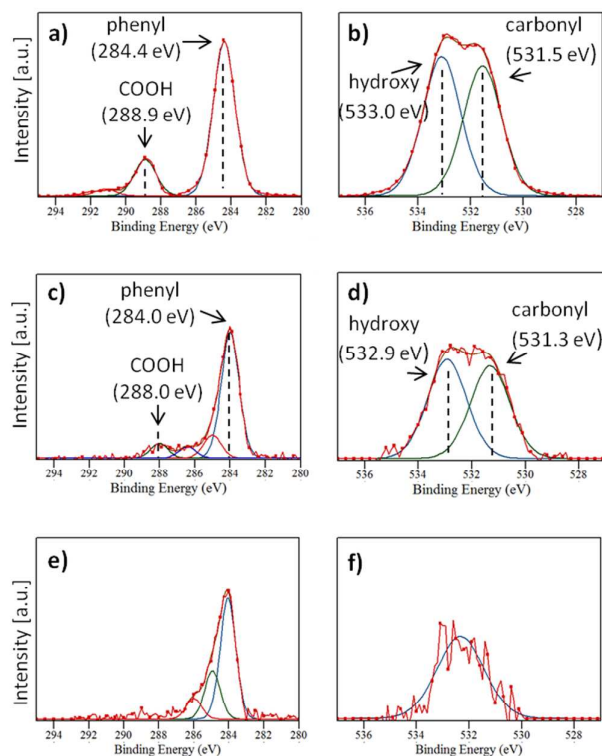

**Figure S3.** XPS Spectra of C1s and O1s for: a), b) TPTC powder sample; c), d) TPTC adsorbed from water on Au(111) and e), f) bare gold sample immersed in water.

**Table S4.** Binding energies fitted from C1s and O1s spectra of following samples: TPTC-powder sample, TPTC deposited from water on Au(111) and bare Au(111) immersed in water.

| Bulk/powder | TPTC-H2O | Au-H2O | C1s      |
|-------------|----------|--------|----------|
| 284.40      | 284.00   | 284.05 | C-C      |
| -           | 285.01   | 284.94 | C        |
| -           | 286.43   | 286.01 | C        |
| 288.90      | 288.03   | -      | COOH     |
| 291.17      | -        | -      | shake-up |

| Bulk/powder | TPTC-H2O | Au-H2O | O1s |
|-------------|----------|--------|-----|
| 531.55      | 531.32   | -      | C=O |
| 533.09      | 532.93   | -      | COH |

#### 4. STM Images

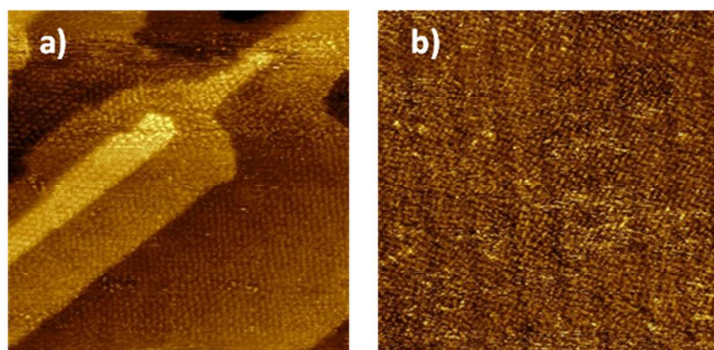

**Figure S4.** Additional STM images (50 nm × 50 nm): a) BPTC and b) TPTC molecules respectively on Au(111) surface.

1. Lin, X.; Jia, J.; Zhao, X.; Thomas, K. M.; Blake, A. J.; Walker, G. S.; Champness, N. R.; Hubberstey, P.; Schröder, M., High H<sub>2</sub> Adsorption by Coordination-Framework Materials. *Angewandte Chemie International Edition* **2006**, 45 (44), 7358-7364.
2. Perdew, J. P.; Burke, K.; Ernzerhof, M., Generalized Gradient Approximation Made Simple [Phys. Rev. Lett. 77, 3865 (1996)]. *Phys Rev Lett* **1997**, 78 (7), 1396-1396.
